# Supplementary material
Source: PubMed Central journal article supplement (PMC3415995)
Supplement: supp_112.141713_141713SI.pdf [file supp_112.141713_141713SI.pdf]

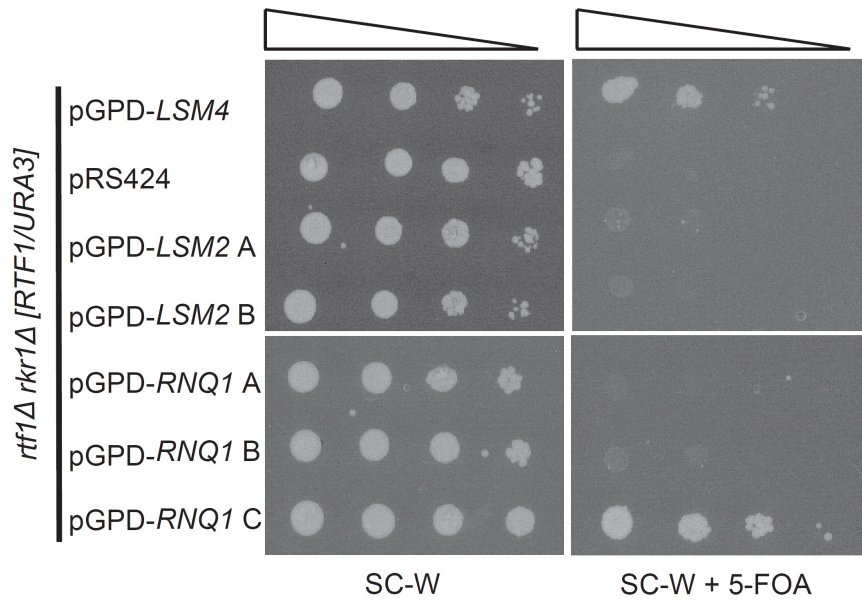

**Figure S1** Effect of *LSM2* or *RNQ1* overexpression on *rtf1Δ rkr1Δ* synthetic lethality. An *rtf1Δ rkr1Δ* strain (KY2205) carrying a *URA3*-marked *RTF1* plasmid was transformed with 2 $\mu$  *TRP1*-marked pGPD-*LSM4*, pGPD-*LSM2*, pGPD-*RNQ1*, or empty vector. Ten-fold serial dilution assays were performed on SC-W or SC-W + 5-FOA media and plates were incubated at 30°C for 2 days. Overexpression of *RNQ1* resulted in 9 out of 23 transformants that showed rescue of *rtf1Δ rkr1Δ* lethality (representative transformants depicted as A, B, or C). No variation in the lack of rescue of *rtf1Δ rkr1Δ* lethality by overexpression of *LSM2* was observed in 25 transformants (representative transformants depicted as A or B).

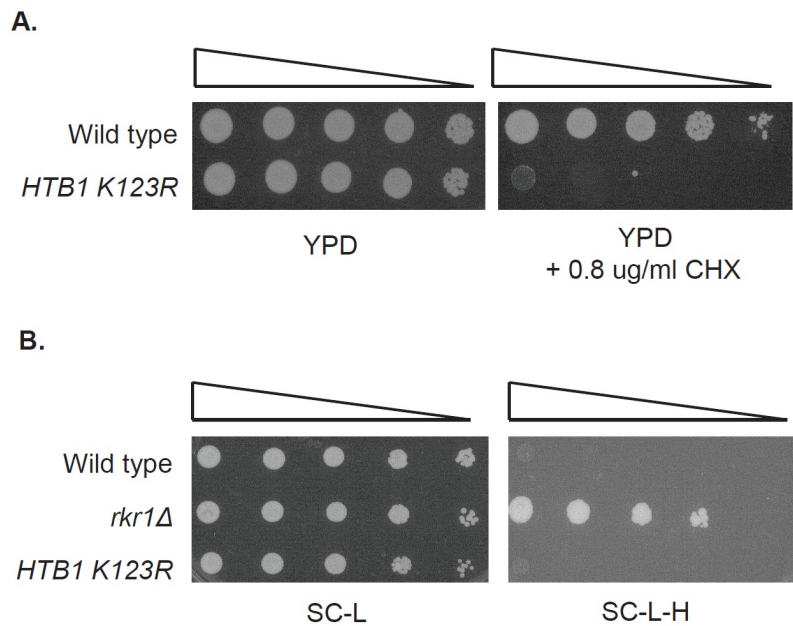

**Figure S2** An H2B K123R mutant strain is sensitive to cycloheximide but does not exhibit increased expression of a nonstop reporter. (A) *HTB1* (KY2043) and *htb1-K123R* (KY2044) strains were grown to saturation and diluted to  $3 \times 10^8$  cells/ml. Ten-fold serial dilutions were performed on YPD or YPD containing 0.8  $\mu$ g/ml cycloheximide (CHX) and incubated at 30°C for 2 or 6 days, respectively. (B) *HTB1* (KY2043) and *htb1-K123R* (KY2044) strains were transformed with a *LEU2*-marked plasmid containing a *his3* nonstop reporter. Strains were then grown to saturation and diluted to  $1 \times 10^8$  cells/ml. Ten-fold serial dilutions were performed on SC-L or SC-L-H and plates were incubated at 30°C for 3 days.

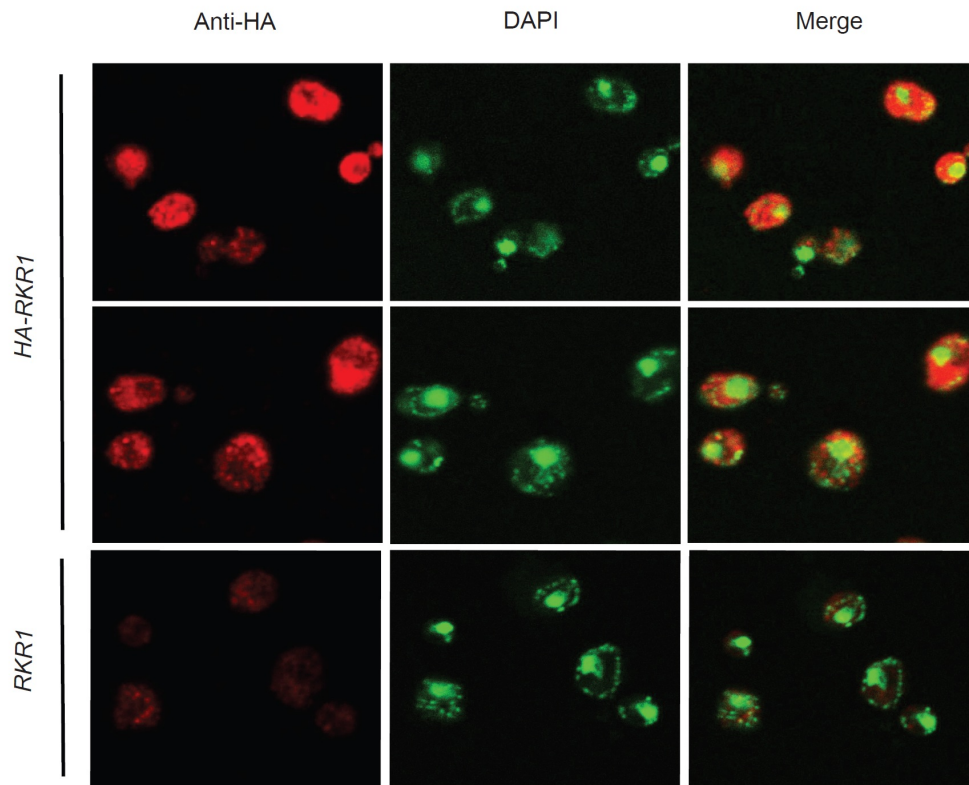

**Figure S3** Localization of HA-Rkr1 is predominantly cytoplasmic. A *rkr1Δ* strain (KY2289) was transformed with either an HA-*RKR1* (pMB11) or untagged *RKR1* (pPC65) plasmid and grown to mid log phase before fixation and incubation with anti-HA antibody primary (Roche) and Alexa Red 647 secondary (Molecular Probes). Cells were mounted with ProLong DAPI stain (Invitrogen) and visualized using confocal microscopy.

**Table S1 *Saccharomyces cerevisiae* strains**

| Strain | Genotype                                                                                                                                        |
|--------|-------------------------------------------------------------------------------------------------------------------------------------------------|
| KY307  | <i>MATα his3Δ200 ura3-52 trp1Δ63 lys2Δ202</i>                                                                                                   |
| KY453  | <i>MATα rtf1Δ100::URA3 his3Δ200 leu2Δ1 ura3-52 trp1Δ63 lys2-173R2</i>                                                                           |
| KY564  | <i>MATα rtf1Δ102::ARG4 his3Δ200 leu2Δ1 ura3-52 trp1Δ63 lys2-173R2 arg4-12</i>                                                                   |
| KY607  | <i>MATα rtf1Δ101::LEU2 his3Δ200 leu2Δ1 ura3-52 lys2-128δ</i>                                                                                    |
| KY761  | <i>MATα his3Δ200 leu2Δ1 ura3-52 trp1Δ63</i>                                                                                                     |
| KY958  | <i>MATα rtf1Δ101::LEU2: his3Δ200 leu2Δ1 ura3Δ0 trp1Δ63 lys2-128δ</i>                                                                            |
| KY1030 | <i>MATα his3Δ200 leu2Δ1 ura3-52 trp1Δ63</i>                                                                                                     |
| KY1404 | <i>MATα htz1Δ::KanMX his3Δ200 leu2Δ0 ura3Δ0 lys2Δ0</i>                                                                                          |
| KY1663 | <i>MATα rtf1Δ102::ARG4 rkr1Δ::KanMX leu2Δ1 ura3-52 arg4-12 [pKA69: RTF1/URA3/C/A]</i>                                                           |
| KY1898 | <i>MATα chl1Δ::KanMX his3Δ200 leu2Δ1 ura3-52 trp1Δ63</i>                                                                                        |
| KY1899 | <i>MATα chl1Δ::KanMX his3Δ200 leu2Δ1 ura3-52</i>                                                                                                |
| KY2043 | <i>MATα hta2-htb2Δ::KanMX his3Δ200 leu2Δ1 ura3-52 trp1Δ63</i>                                                                                   |
| KY2044 | <i>MATα HTA1-htb1K123R hta2-htb2Δ::KanMX his3Δ200 leu2Δ1 ura3-52 trp1Δ63</i>                                                                    |
| KY2202 | <i>MATα rkr1Δ::HIS3 his3Δ200 leu2Δ1 ura3-52</i>                                                                                                 |
| KY2203 | <i>MATα hta1-htb1Δ::LEU2 hta2-htb2Δ::TRP1 his3Δ200 leu2Δ1 ura3-52 trp1Δ63 [URA3/HTA1-HTB1/C/A] [HIS3/HTA1-FLAG-htb1-K123R/C/A]</i>              |
| KY2204 | <i>MATα hta1-htb1Δ::LEU2 hta2-htb2Δ::TRP1 rkr1Δ::KanMX his3Δ200 leu2Δ1 ura3-52 trp1Δ63 [URA3/HTA1-HTB1/C/A] [HIS3/HTA1-FLAG-htb1-K123R/C/A]</i> |
| KY2205 | <i>MATα rtf1Δ102::ARG4 rkr1Δ::KanMX leu2Δ1 ura3-52 arg4-12 trp1Δ63 [pKA69: RTF1/URA3/C/A]</i>                                                   |
| KY2206 | <i>MATα chl1Δ::KanMX rtf1Δ101::LEU2 rkr1Δ::HIS3 his3Δ200 leu2Δ1 ura3-52 trp1Δ63</i>                                                             |
| KY2207 | <i>MATα chl1Δ::KanMX rtf1Δ101::LEU2 his3Δ200 leu2Δ1 ura3-52 trp1Δ63</i>                                                                         |
| KY2208 | <i>MATα chl1Δ::KanMX rkr1Δ::KanMX his3Δ200 leu2Δ1 ura3-52 trp1Δ63 arg4-12</i>                                                                   |
| KY2209 | <i>MATα rtf1Δ::KanMX rkr1Δ::KanMX his3Δ200 leu2Δ1 ura3-52 trp1Δ63 [psi<sup>-</sup>]</i>                                                         |
| KY2210 | <i>MATα rtf1Δ::KanMX rkr1Δ::KanMX his3Δ200 leu2Δ1 trp1Δ63 [psi<sup>-</sup>]</i>                                                                 |
| KY2211 | <i>MATα rtf1Δ::KanMX his3Δ200 leu2Δ1 ura3Δ0 trp1Δ63</i>                                                                                         |
| KY2212 | <i>MATα ade1-14 leu2Δ1 ura3-52 trp1Δ63</i>                                                                                                      |
| KY2213 | <i>MATα rtf1Δ101::LEU2 ade1-14 leu2Δ1 ura3-52 trp1Δ63</i>                                                                                       |
| KY2214 | <i>MATα chl1Δ::KanMX ade1-14 leu2Δ1 ura3-52 trp1Δ63</i>                                                                                         |
| KY2215 | <i>MATα chl1Δ::KanMX rtf1Δ101::LEU2 ade1-14 leu2Δ1 ura3-52 trp1Δ63</i>                                                                          |
| KY2236 | <i>MATα rkr1Δ::KanMX his3Δ200 leu2Δ1 ura3-52 trp1Δ63</i>                                                                                        |
| KY2286 | <i>MATα rtf1Δ101::LEU2 rkr1Δ::KanMX his3Δ200 leu2Δ1 ura3-52 ade1-14 [psi<sup>-</sup>]</i>                                                       |
| KY2289 | <i>MATα rkr1Δ::HIS3 his3Δ200 leu2Δ1 trp1Δ63 lys2-128δ</i>                                                                                       |
| KY2292 | <i>MATα rkr1Δ::KanMX his3Δ200 leu2Δ1 ura3-52 ade1-14 [psi<sup>-</sup>]</i>                                                                      |
| KY2306 | <i>MATα rkr1Δ::KanMX sup35-Y351C his3Δ200 leu2Δ1 ura3-52 trp1Δ63 ade1-14 [psi<sup>-</sup>]</i>                                                  |
| KY2309 | <i>MATα rkr1Δ::KanMX his3Δ200 leu2Δ1 ura3-52 ade1-14 [psi<sup>-</sup>]</i>                                                                      |
| L2261  | <i>MATα kar1 ura2 leu2 his [PIN<sup>+</sup>]</i>                                                                                                |
| L2265  | <i>MATα kar1 ura2 leu2 his [PSI<sup>+</sup>]</i>                                                                                                |
