# Supplementary material
Source: PubMed Central journal article supplement (PMC3415995)
Supplement: supp_112.141713_FigureS1.pdf [file supp_112.141713_FigureS1.pdf]

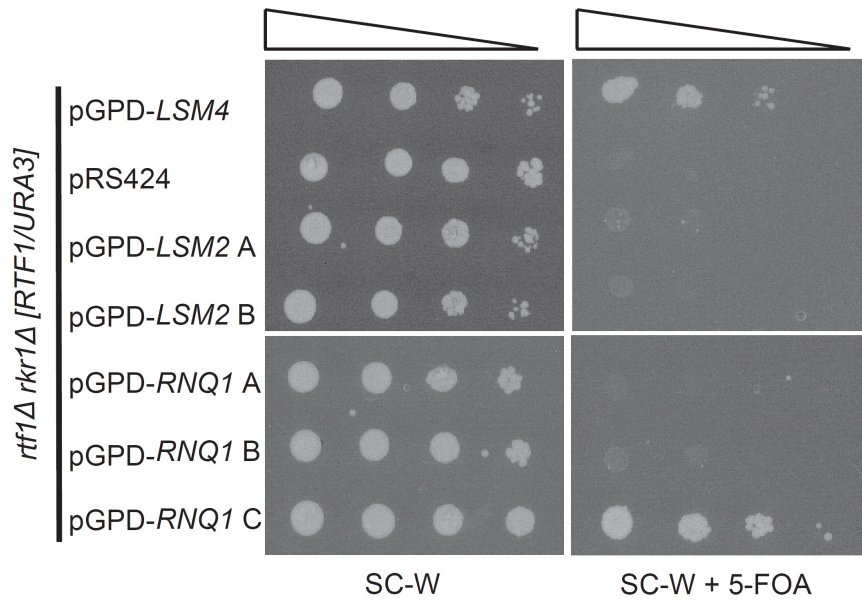

**Figure S1** Effect of *LSM2* or *RNQ1* overexpression on *rtf1Δ rkr1Δ* synthetic lethality. An *rtf1Δ rkr1Δ* strain (KY2205) carrying a *URA3*-marked *RTF1* plasmid was transformed with 2 $\mu$  *TRP1*-marked pGPD-*LSM4*, pGPD-*LSM2*, pGPD-*RNQ1*, or empty vector. Ten-fold serial dilution assays were performed on SC-W or SC-W + 5-FOA media and plates were incubated at 30°C for 2 days. Overexpression of *RNQ1* resulted in 9 out of 23 transformants that showed rescue of *rtf1Δ rkr1Δ* lethality (representative transformants depicted as A, B, or C). No variation in the lack of rescue of *rtf1Δ rkr1Δ* lethality by overexpression of *LSM2* was observed in 25 transformants (representative transformants depicted as A or B).
