# Supplementary material
Source: PubMed Central journal article supplement (PMC3415995)
Supplement: supp_112.141713_FigureS2.pdf [file supp_112.141713_FigureS2.pdf]

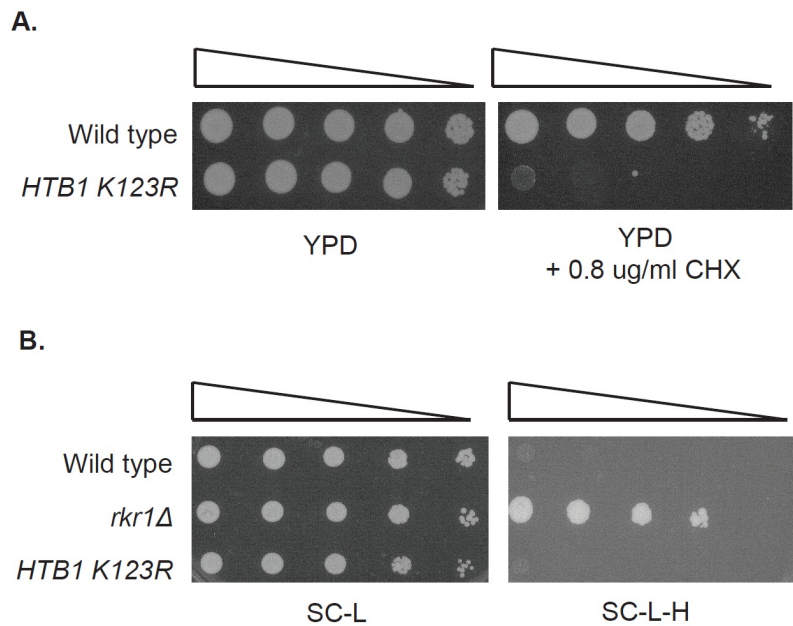

**Figure S2** An H2B K123R mutant strain is sensitive to cycloheximide but does not exhibit increased expression of a nonstop reporter. (A) *HTB1* (KY2043) and *htb1-K123R* (KY2044) strains were grown to saturation and diluted to  $3 \times 10^8$  cells/ml. Ten-fold serial dilutions were performed on YPD or YPD containing 0.8  $\mu\text{g/ml}$  cycloheximide (CHX) and incubated at 30°C for 2 or 6 days, respectively. (B) *HTB1* (KY2043) and *htb1-K123R* (KY2044) strains were transformed with a *LEU2*-marked plasmid containing a *his3* nonstop reporter. Strains were then grown to saturation and diluted to  $1 \times 10^8$  cells/ml. Ten-fold serial dilutions were performed on SC-L or SC-L-H and plates were incubated at 30°C for 3 days.
