# Supplementary material
Source: PubMed Central journal article supplement (PMC3415995)
Supplement: supp_112.141713_FigureS3.pdf [file supp_112.141713_FigureS3.pdf]

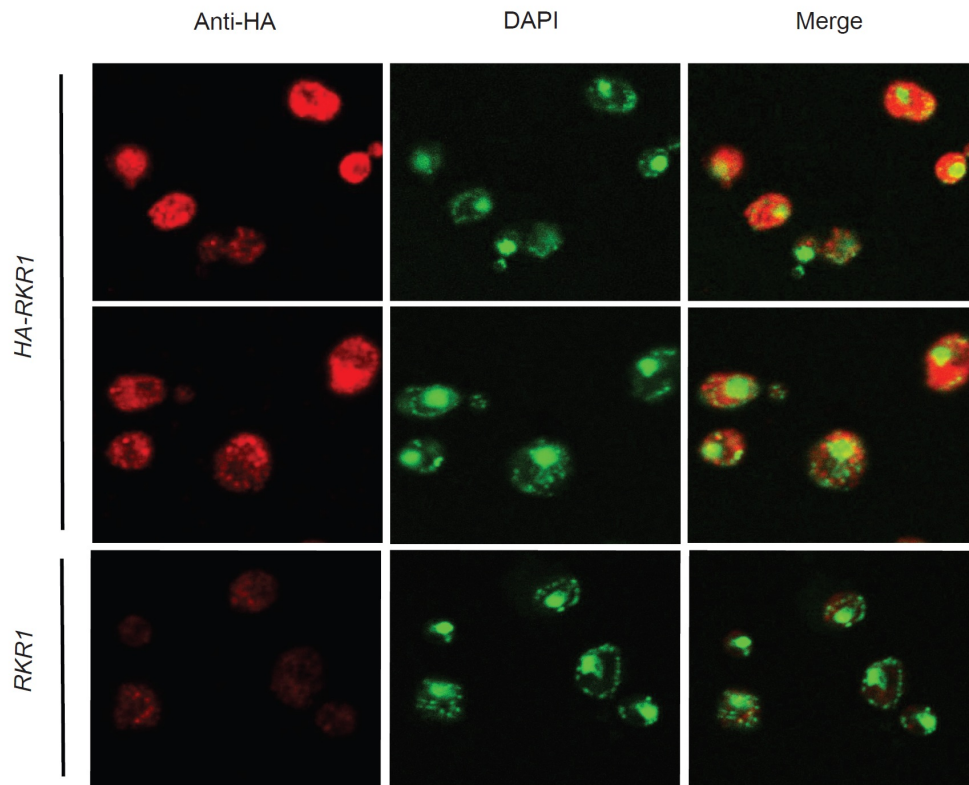

**Figure S3** Localization of HA-Rkr1 is predominantly cytoplasmic. A *rkr1Δ* strain (KY2289) was transformed with either an HA-*RKR1* (pMB11) or untagged *RKR1* (pPC65) plasmid and grown to mid log phase before fixation and incubation with anti-HA antibody primary (Roche) and Alexa Red 647 secondary (Molecular Probes). Cells were mounted with ProLong DAPI stain (Invitrogen) and visualized using confocal microscopy.
